# Supplementary material
Source: PubMed Central journal article supplement (PMC3125470)
Supplement: NIHMS301743-supplement-1_si_001.pdf [file NIHMS301743-supplement-1_si_001.pdf]

# Supporting Information for

The Reversible Acetylation and Inactivation of *Mycobacterium tuberculosis*

Acetyl-CoA Synthetase is Dependent on cAMP †

*Hua Xu, Subray S. Hegde and John S. Blanchard\**

Department of Biochemistry, Albert Einstein College of Medicine, 1300 Morris Park Avenue, Bronx,

New York 10461

Table S1: Oligonucleotides

| Name                 | Sequence <sup>a</sup>                            |
|----------------------|--------------------------------------------------|
| <i>MsPat_F</i>       | 5' ggaattccat <u>at</u> ggcggaaactgaccgaggttc 3' |
| <i>MsPat_R</i>       | 5' atagtttagcggccgctggctcaccgcccggatc 3'         |
| <i>Rv0998_F</i>      | 5' ggaattccat <u>at</u> gttgacgggatagccgaat 3'   |
| <i>Rv0998_R</i>      | 5' cgcggatccgccgacggcctcgatcactt 3'              |
| <i>Rv1151c_F</i>     | 5' atcccgc <u>ct</u> catatgcgagtgccggtgctcagc 3' |
| <i>Rv1151c_R</i>     | 5' atcccgc <u>ctc</u> gagctattcagcagggcgggcag 3' |
| <i>MsACS_F</i>       | 5' ggaattccat <u>at</u> gtgctgcgcgatctggag 3'    |
| <i>MsACS_R</i>       | 5' cccaagcttctacttgctcgcgcggatca 3'              |
| <i>MtACS_F</i>       | 5' ggaattccat <u>at</u> gagtgagtcacccccgaag 3'   |
| <i>MtACS_R</i>       | 5' cccaagcttctacttgccggcccgatcgc 3'              |
| <i>MtACS K617A_F</i> | 5' gactcgtagcggcgc <u>ca</u> atcatgcgtcgac 3'    |
| <i>MtACS K617A_R</i> | 5' gtcgacgcatgattgcgcccgtacgagtc 3'              |

<sup>a</sup> Restriction sites are italicized, while mutation sites are indicated in underline.

Table S2: Mass spectrometric analysis of the substrate of *MsPat*

GI: 118467355

acetyl-coenzyme A synthetase [*Mycobacterium smegmatis* str. mc<sup>2</sup> 155]

16 unique peptides, 20 unique spectra, 41 total spectra, 200/940 amino acids (21% coverage)

| Peptide Sequence    | Probability | Modifications              | Observed | Actual Mass | z | Delta AMU |
|---------------------|-------------|----------------------------|----------|-------------|---|-----------|
| AANALTDLGLVAGDR     | 95%         |                            | 729.07   | 1,456.12    | 2 | 0.35      |
| AASLKEAVDEAVADQPSVK | 95%         |                            | 964.70   | 1,927.39    | 2 | 0.40      |
| ASAHGGPENMIEELR     | 95%         |                            | 805.59   | 1,609.17    | 2 | -0.58     |
| EAVDEAVADQPSVK      | 95%         |                            | 729.19   | 1,456.36    | 2 | -0.34     |
| ELGDTSTLVDPSVFEAIR  | 95%         |                            | 975.24   | 1,948.47    | 2 | 0.49      |
| FAEQGWYFAGDGAR      | 95%         |                            | 787.76   | 1,573.51    | 2 | -0.19     |
| IDDVMNVSGHR         | 95%         |                            | 414.48   | 1,240.43    | 3 | -1.15     |
| LLGSVGEPINPEAWR     | 95%         |                            | 819.78   | 1,637.54    | 2 | 0.69      |
| INVAYNcVDR          | 95%         | Carbamidomethylation (Cys) | 612.22   | 1,222.42    | 2 | -0.16     |
| LVITSDGQYR          | 95%         |                            | 576.24   | 1,150.47    | 2 | -0.13     |
| PASHDLSSLR          | 95%         |                            | 542.02   | 1,082.02    | 2 | 0.47      |
| SITYAELKDEVcK       | 95%         | Carbamidomethylation (Cys) | 778.51   | 1,555.01    | 2 | 0.25      |
| VAIHWEGEPVGDAR      | 95%         |                            | 512.25   | 1,533.73    | 3 | -1.02     |
| WYREHIGGGK          | 95%         |                            | 601.76   | 1,201.50    | 2 | -0.10     |
| YSDSDGHIWVLGR       | 95%         |                            | 709.63   | 1,417.24    | 2 | 0.57      |
| YGVTIYYTAPTLIR      | 95%         |                            | 816.15   | 1,630.28    | 2 | 0.40      |

**Figure S1:** Sequence alignment of protein acetyltransferases in mycobacteria.

Multiple sequence alignment of MSMEG\_5458 (*MsPat*) from *M. smegmatis* and Rv0998 (*MtPat*) from *M. tuberculosis* was performed using ClustalW. The two proteins exhibit 56% sequence identity and 70% similarity.

**Figure S2:** SDS-PAGE analysis of recombinant proteins.

Lane 1: wild type *MtACS*; lane 2: *MsPat* purified under native conditions; lane 3: *MtACS* K617A; lane 4, renatured *MsPat* (apo *MsPat*); lane 5, Rv1151c; lane 6: protein ladder.

**Figure S3:** Characterization of the filtrate after denaturing MSMEG\_5458.

(A) UV-Visible spectrum of the filtrate. (B) HPLC analysis of the filtrate. The chromatograms of the filtrate (solid line), cAMP standard (dotted line) and 5'-AMP (dashed line) are shown.

**Figure S4:** cAMP Standard Curve.

Various amounts of cAMP were analyzed by reverse phase HPLC using Phenomenex Gemini-C18 column (250 mm × 4.6 mm). The peak area was plotted against the amount of cAMP.

**Figure S5:** Sequence alignment of sirtuin-like deacetylases.

Multiple sequence alignment of CobB from *S. enterica*, MSMEG\_4620, MSMEG\_5175 and Rv1151c was performed using ClustalW. Rv1151c is only homologue of CobB in *M. tuberculosis*, which is 33% identical to CobB. The two CobB homologues in *M. smegmatis*, MSMEG\_5175 and MSMEG\_4620 share 36% and 24% sequence identity to CobB, respectively.

**Figure S1:** Sequence alignment of protein acetyltransferases in mycobacteria.

```

MsPat      ----MAELTEVRAADLAALEFFFTGCRPSALEPLATQLRPLKAEPGQVLIROGDPALTFML 56
Rv0998     -LDGIAELTGARVEDLAGMDVFGQCPAEGLVSLAASVQPLRAAAGQVLLRQGEPAVSFLL 59
           :***** .*. ***.:.:.* ** ...* .**.:.:**:* .*****:***:***:***:*

MsPat      I-ESGRVQVSHAVADGPPIVLDIEPGLIIGEIALLRDAPRTATVVAEAPVIGWVGDRDAF 115
Rv0998     I-SSGSAEVSHVGDDGVAIIARALPGMIVGEIALLRDSPRSATVTTIEPLTGWTGGRGAF 118
           * .** .:***. ** .*:      **:*:*****:***:***.: **:* **.*.*.**

MsPat      DT-ILHLPGMFDRLVRIARQRLAAAFITPIPVQVRTGEWFYLRPVLPGDVERTLNGPVEFS 174
Rv0998     AT-MVHIPGVGERLLRTARQRLAAAFVSPIPVRLADGTQLMLRPVLPGDREERTVHGHIQFS 177
           * :*:***: :**:* *****:*****: * : ***** *****:* :**

MsPat      SET-LYRRFQSVRKPTRALLEYLFEVDYADHFVWVMTEGALGPVIADARFVREGHNATMA 233
Rv0998     GET-LYRRFMSARVPSPALMHYLSEVDYVDHFVWVVTDGSD--PVADARFVRDETDPPTVA 234
           .** ***** *. * *: **:.* ***.*****:***: :*****: :.***

MsPat      EVAFTV-GDDYQGRGIGSFLMGALIVSANYVGVQRFNARVLTDNMAMRKIMDRLGAVWVR 292
Rv0998     EIAFTV-ADAYQGRGIGSFLIGALSVAARVDGVERFAARMLSDNVPMRTIMDRYGAVWQR 293
           *:***** .* *****:*** *:. **:* **:*:***:.*.***** ***** *

MsPat      EDLGVVM-TEVDVPPVDTVPFEPOLIDQIRDATRKVIRAVSQ 333
Rv0998     EDVGVIT-TMIDVPGPGELSLGREMVDQINRVARQVIEAVG- 333
           **:**: * :*** . :.: *:*:***. .:***:***.

```

**Figure S2:** SDS-PAGE analysis of recombinant proteins.

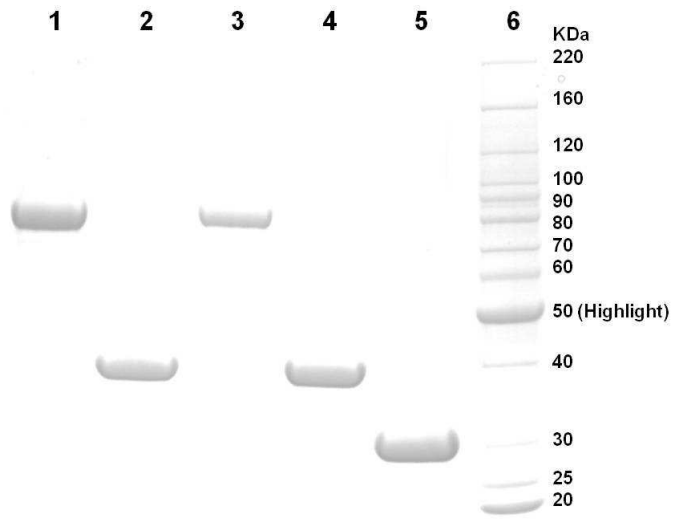

**Figure S3:** Characterization of the filtrate after denaturing MSMEG\_5458.

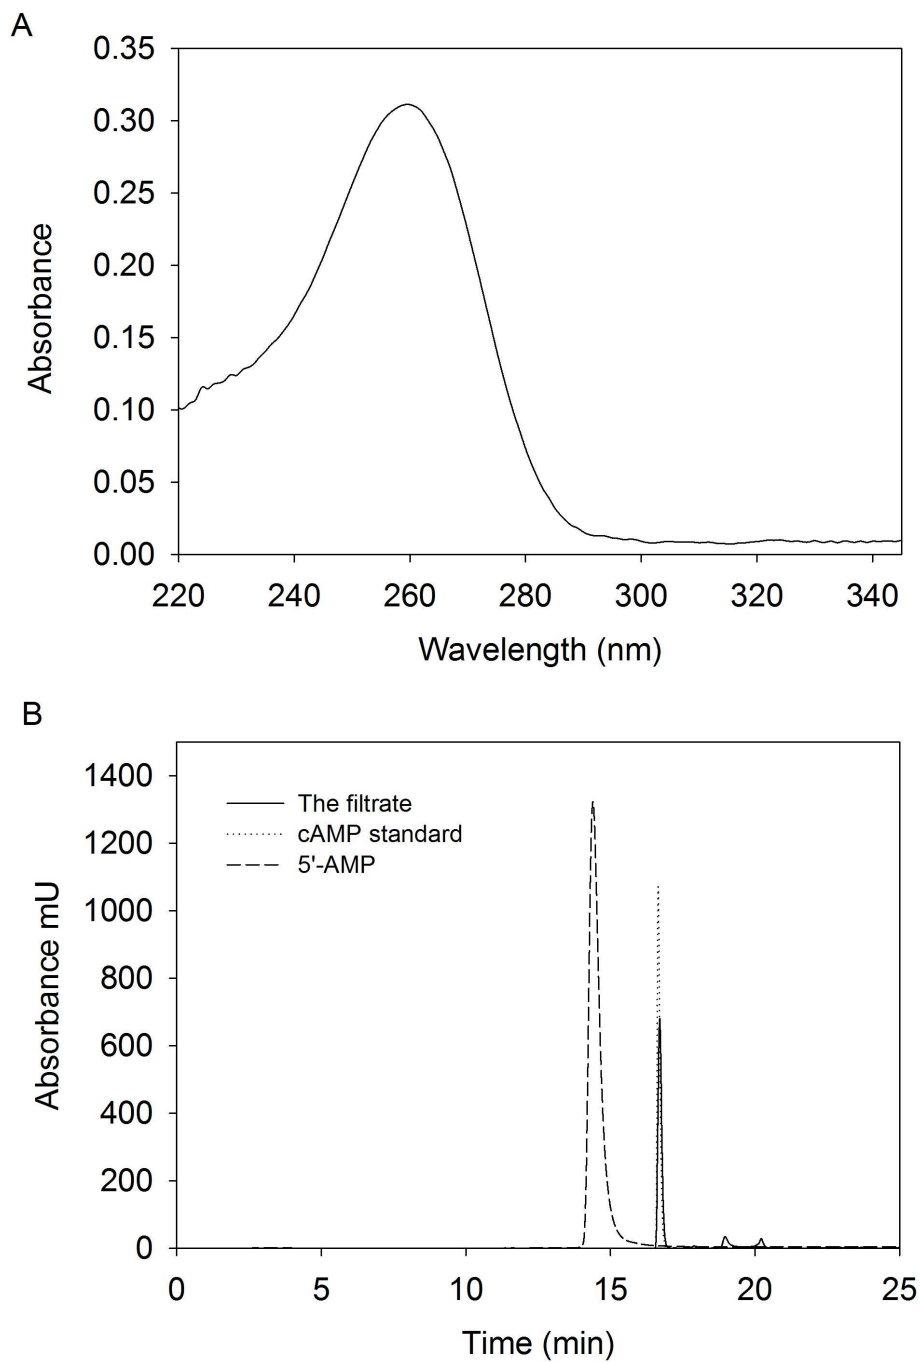

**Figure S4:** cAMP standard curve.

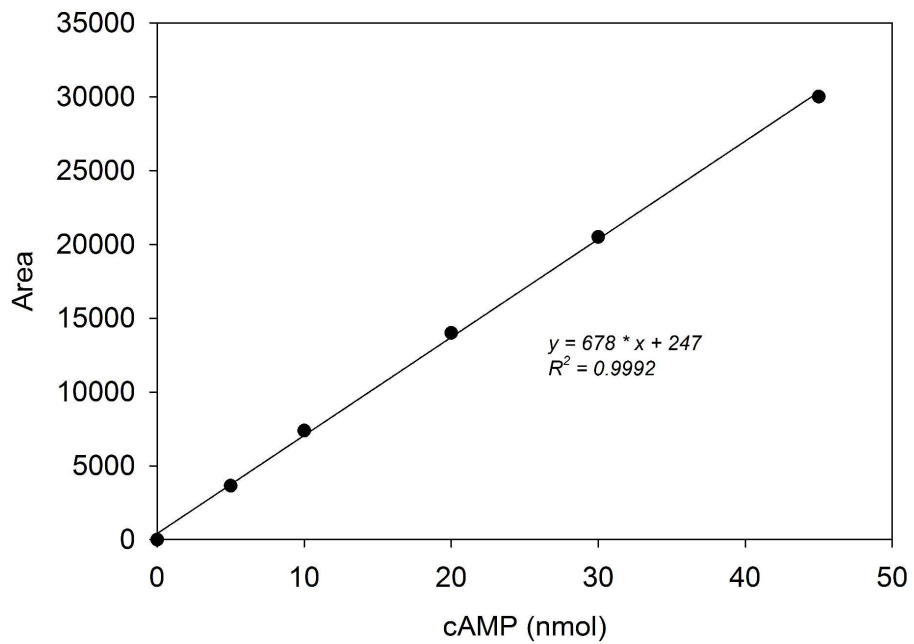



**Figure S5:** Sequence alignment of sirtuin-like deacetylases.

```
Rv1151c -----MRVAVLSGAGISAESGVPTF 20
MSMEG5175 -----MQVTVLSGAGISAESGVPTF 20
cobB MQSRRFHRLSRFRKNKRLRLRERLRQRIFFRDRVPEMMENPRVLVLTGAGISAESGIRTF 60
MSMEG4620 -----MDAPELVALLQGRRIVALTGAGMSTDSGIPDY 32
                :: .*:***:*:*:*: :

Rv1151c RDDKNGLWARFDPYELSSSTQGWLRLNPERVWGWYLRHRYLVAN--VEPNDGHRARIAAWQDH 78
MSMEG5175 RDAETGLWAQVDPYEISSTDGWQRNPEKVVAWYLRHRYMMAR--VAPNEAHRVVAWEDH 78
cobB R-AADGLWEHRVEDVATPEGFARNPGLVQTFYNARRQQLQQPEIQPNAHLALAKLEEA 119
MSMEG4620 RGPDSPPSPNPMTIQQFTSDP-VFRQRYWARNHVGRHMDETQ----PNAGHRALAAMEAS 87
*          :.: :          * : .          * : .          ** .* :.* :

Rv1151c AEVS--VITQNVDDLHERAGSGAVHHHLHGSLFEFRCA-----RCGVPYTDALP- 124
MSMEG5175 LDVR--VVTQNIDDLHERAGSTNVYHLHGSLFEFRCD-----ACGSAFEGNLP- 124
cobB LGDRFLLVTQNIDNLHERAGRNRI IHMHGELLKVRCS-----QSGQILEWNGD- 167
MSMEG4620 GVVAG-VITQNVDDLHTKAGSREVINLHGTYAQVVCCLNPD CGHTMSRAALAVMLEEANPG 146
                :*:**:* ** :** . : :** :. *

Rv1151c -----EMPEPAIEVEPPVCDGGLIRPDIVWFGEPLPEEPWRSVE 165
MSMEG5175 -----EMPEPVETIDPPVCPCSLIRPSVWVWFGEPLPDAAWNRSVL 165
cobB -----VMPE----DKCHCCQFPAPLRPHVVWFGE-MP-LGMDEIYM 202
MSMEG4620 FLARAESVGGIAVAPDADAMITDTASFVVDCPMCGGMLKPDIVYFGDSVPKTRVEQAYS 206
                :.: . :*: *:*:**: :*

Rv1151c ATGSADVMMVVGTS AIVYPAAGLPDLALARGTAVIEVNP EPTPLSGSATISIRESASQAL 225
MSMEG5175 AVSSADVIVVGTSSIVYPAAGLPEAALAAGKPVIEVNP ERTPLSDSATVSLRETASEAL 225
cobB ALSMADIFIAIGTSGHVYPAAGFVHEAKLHGAHTVELNL EPSQVGSEFEKHYGPASQVV 262
MSMEG4620 LVDSADALLVAGS SLTVFSGYRFVRHAAARGIPVGI VNRGPTRGDDLAAVKVHSGCSEML 266
. ** :. *:* *:. : * * . :* : .. . .* :

Rv1151c PGLLERLPALLK---- 237
MSMEG5175 PTL LQRLPELLNSA- 240
cobB PEFVDKFLKGL----- 273
MSMEG4620 TLLAGELTRTYTASPG 282
. : .:
```
